# Supplementary material for: Transition metals anchored on nitrogen-doped graphdiyne for an efficient oxygen reduction reaction: a DFT study
Source: Royal Society of Chemistry journal article supplement (doi:10.1039/d3cp03971d), 2023-12-16
Supplement: d3cp03971d1.pdf [file d3cp03971d1.pdf]

## Supporting information

# Tuning sp-hybridized N anchored the single atom on graphdiyne for efficient oxygen reduction reaction: A DFT study

Ning Wang<sup>1</sup>, Siyu Gan<sup>1</sup>, Yunfeng Mao<sup>2</sup>, Junping Xiao<sup>3,\*</sup>, Chunming Xu<sup>4,5</sup>, and Tianhang Zhou<sup>4,5,\*</sup>

1 School of Science, Key Laboratory of High-Performance Scientific Computation, Xihua University, Chengdu 610039, China

2 School of Energy and Power Engineering, University of Shanghai for Science and Technology, Shanghai, 200093, China

3 College of Physics and Electronic Information, Baicheng Normal University, Baicheng, Jilin 137000, China

4 College of Carbon Neutrality Future Technology, China University of Petroleum (Beijing), Beijing 102249, China;

5 State Key Laboratory of Heavy Oil Processing, China University of Petroleum (Beijing), Beijing 102249, China

\* Correspondence: [djtc999@163.com](mailto:djtc999@163.com) (Junping Xiao); [zhouth@cup.edu.cn](mailto:zhouth@cup.edu.cn) (Tianhang Zhou)

## 1. Computational details

The formation energy ( $\Delta E_f$ ) of the N-doping site in GDY is calculated as:

$$\Delta E_f = E(\text{N-doped GDY}) - \frac{m-n}{m} E(\text{GDY}) - \frac{n}{2} E(\text{N}_2)$$

where  $E(\text{N-doped GDY})$  and  $E(\text{GDY})$  are the total energies of the N-doped and original GDY, respectively.  $E(\text{N}_2)$  is the total energy of an isolated  $\text{N}_2$  molecule.  $m$  and  $n$  are the number of carbon atoms in the original GDY and the number of doped N atoms, respectively.

## 2. Results

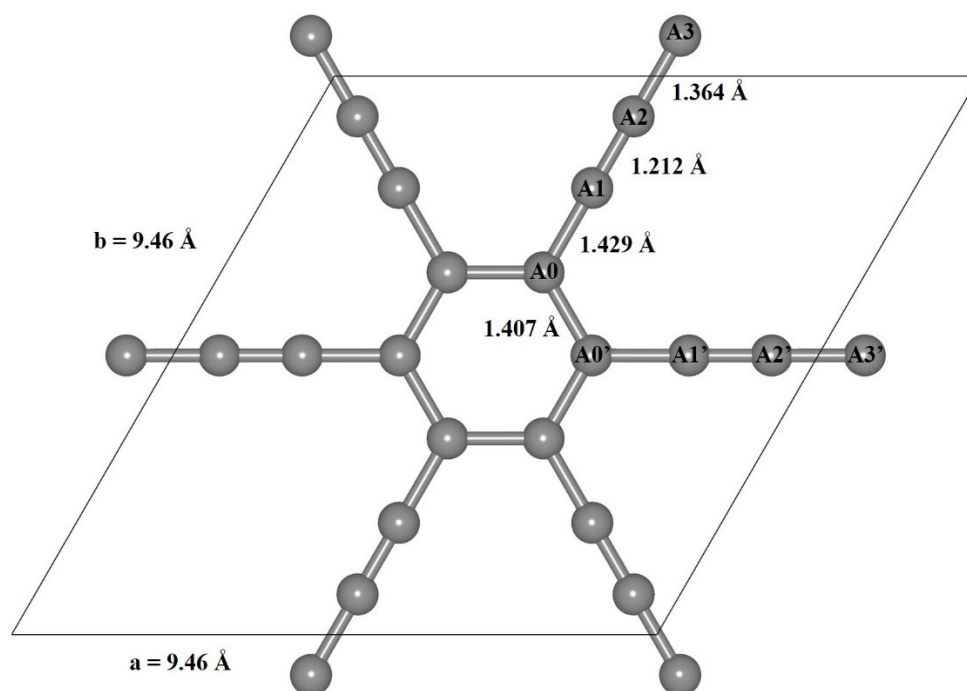

Fig. S1. The structure of pristine GDY. Note that the position of N-doping sites is marked as A1, A1', A2, A2'.

Table S1. Formation energies ( $\Delta E_f$ ) of N-doping sites in GDY.

| N-doping sites | Structure                                                                           | $\Delta E_f$ (eV) |
|----------------|-------------------------------------------------------------------------------------|-------------------|
| A1-A2          | 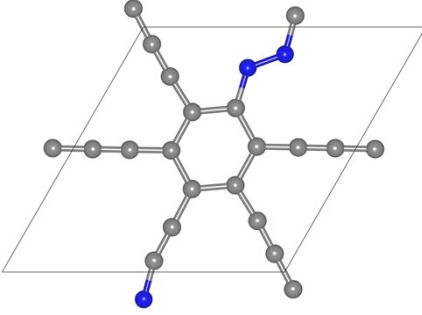   | 1.16              |
| A1-A2'         |   | 0.86              |
| A2- A2'        |  | 1.00              |
| A1-A1'         |  | 0.69              |

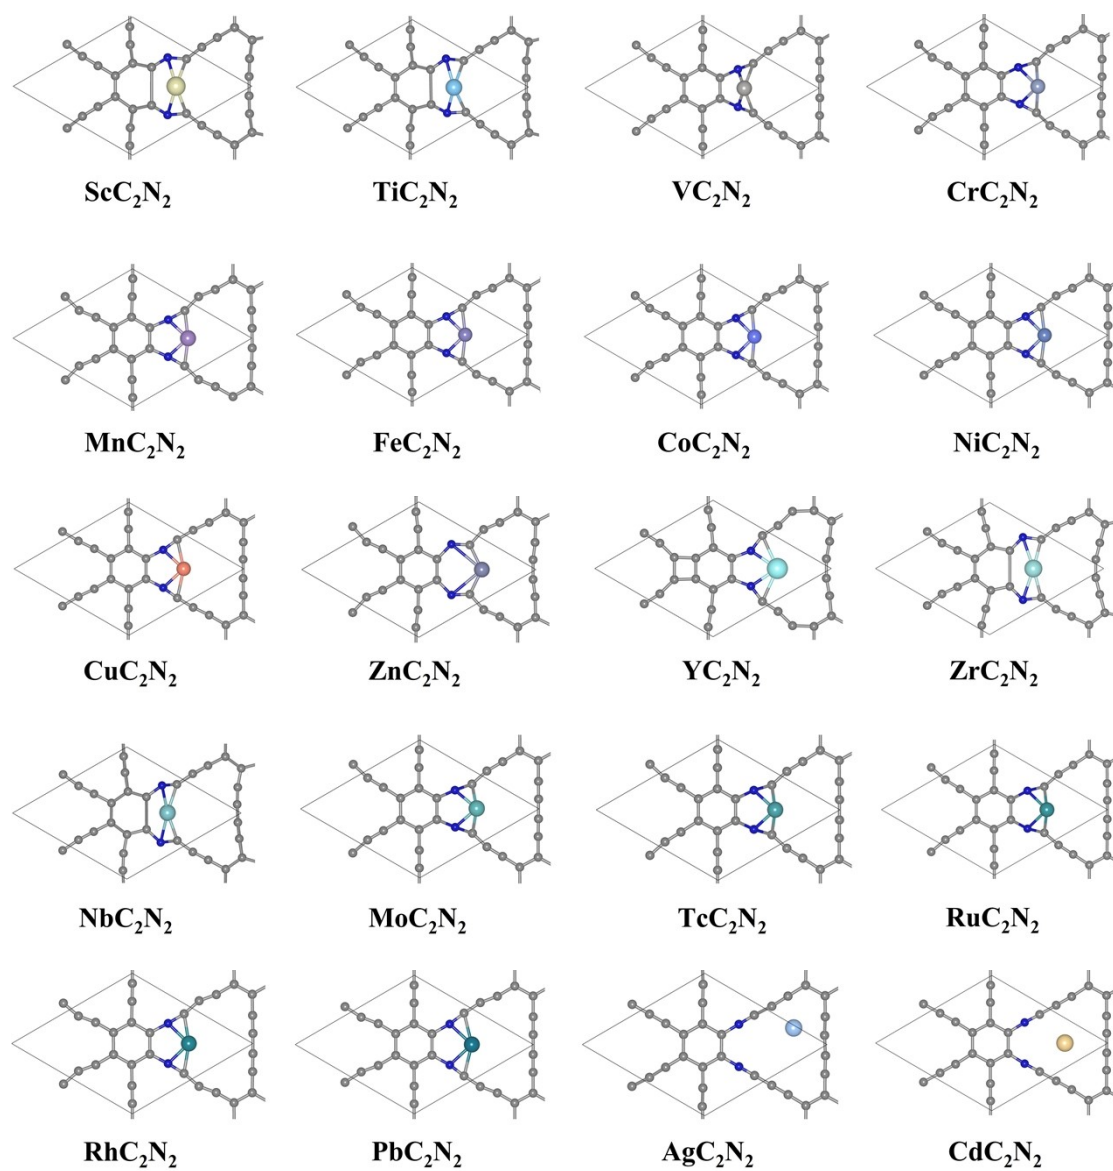

Fig. S2. Optimized structures of  $\text{TMC}_2\text{N}_2$ .

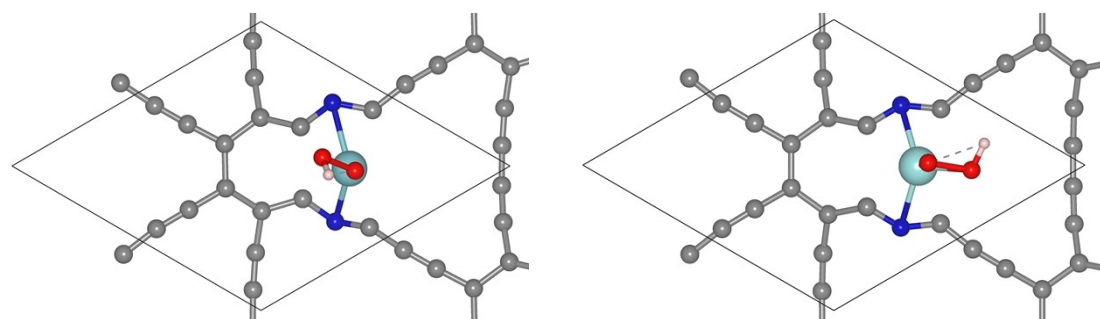

Fig. S3. Configurations of  $^*\text{OOH}$  adsorbed on  $\text{NbC}_2\text{N}_2$  and  $\text{ZrC}_2\text{N}_2$ .

Table S2. Corresponding free energies of adsorption of \*OOH, \*O, and \*OH on TMC<sub>2</sub>N<sub>2</sub> and TMC<sub>2</sub>N<sub>2</sub>-OH. The values in the brackets are obtained in the H<sub>2</sub>O solvent environment.

|    | before OH ligand modification |                 |                  | after OH ligand modification |                 |                  |
|----|-------------------------------|-----------------|------------------|------------------------------|-----------------|------------------|
|    | $\Delta G_{*OOH}$             | $\Delta G_{*O}$ | $\Delta G_{*OH}$ | $\Delta G_{*OOH}$            | $\Delta G_{*O}$ | $\Delta G_{*OH}$ |
| Sc | 2.28(1.93)                    | -0.23(-0.51)    | -0.98(-1.53)     | 3.48(3.13)                   | -0.73(-1.05)    | 0.19(-0.44)      |
| Ti | 1.44(1.11)                    | -0.82(-1.12)    | -1.82(-2.44)     | 3.47(3.13)                   | 0.59(0.32)      | 0.03(-0.53)      |
| V  | 1.70(1.35)                    | -1.34(-1.63)    | -1.77(-2.41)     | 5.32(4.96)                   | 3.84(3.53)      | 0.55(-0.09)      |
| Cr | 2.12(1.84)                    | -0.71(-1.01)    | -1.28(-1.85)     | 4.66(4.31)                   | 0.41(0.13)      | 0.37(-0.25)      |
| Mn | 2.54(2.24)                    | -0.39(-0.72)    | -0.76(-1.51)     | 3.42(3.02)                   | 1.32(0.98)      | 0.84(0.30)       |
| Fe | 2.63(2.29)                    | 0.22(-0.05)     | -0.88(-1.59)     | 3.87(3.50)                   | 1.45(1.12)      | 0.69(0.04)       |
| Co | 3.23(2.94)                    | 0.65(0.32)      | -0.11(-0.68)     | 3.28(2.95)                   | 0.87(0.55)      | -0.06(-0.64)     |
| Ni | 2.72(2.46)                    | 0.35(0.04)      | -0.34(-0.96)     | 3.07(2.73)                   | 0.61(0.32)      | 0.54(-0.04)      |
| Cu | 2.67(2.39)                    | 0.35(0.02)      | -0.76(-1.35)     | 2.71(2.38)                   | 0.66(0.39)      | 0.67(0.03)       |
| Y  | 1.73(1.39)                    | -0.80(-1.08)    | -1.96(-2.53)     | 3.37(3.03)                   | 2.90(2.58)      | 0.02(-0.60)      |
| Mo | 1.41(1.07)                    | -0.96(-1.21)    | -1.61(-2.25)     | 3.19(2.85)                   | 0.28(-0.04)     | -0.12(-0.71)     |
| Tc | 2.17(1.83)                    | -0.96(-1.26)    | -1.14(-1.71)     | 3.47(3.13)                   | 0.95(0.68)      | 0.95(0.31)       |
| Ru | 3.04(2.71)                    | 0.05(-0.24)     | -0.23(-0.87)     | 3.61(3.06)                   | 2.15(-0.48)     | 0.51(-0.11)      |
| Rh | 1.63(1.22)                    | -0.04(-0.39)    | -1.47(-2.05)     | 3.41(3.09)                   | -0.21(-0.59)    | -0.01(-0.65)     |

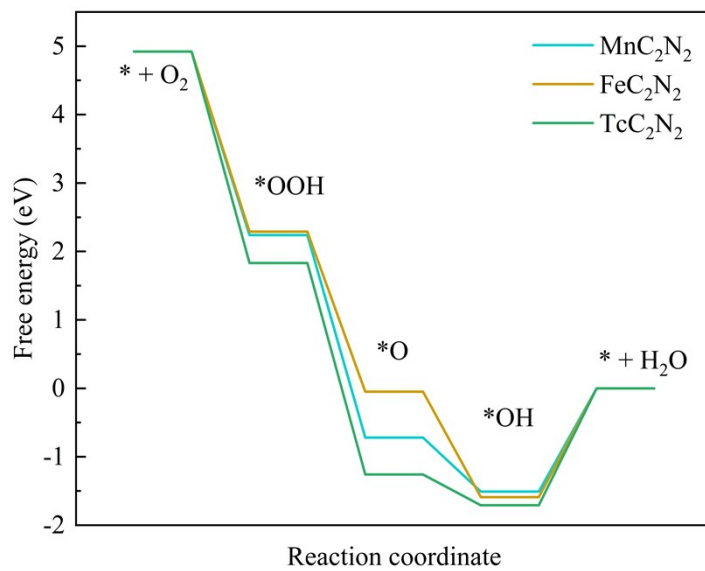

Fig. S4. Free energy diagrams of MnC<sub>2</sub>N<sub>2</sub>, FeC<sub>2</sub>N<sub>2</sub>, and TcC<sub>2</sub>N<sub>2</sub>.
